# Supplementary material for: Markers of kidney tubular and interstitial injury and function among sugarcane workers with cross-harvest serum creatinine elevation
Source: PubMed Central journal article supplement (PMC9120403; doi:10.1136/oemed-2021-107989), 2021-12-31
Supplement: oemed-2021-107989supp001.pdf [file oemed-2021-107989supp001.pdf]

Table 1. Urine tubular injury markers among sugarcane cutters without adjustment for urine creatinine.

| Marker      |       |        |     | Cases (cross-harvest SCr increase by 0.3 mg/dL) |                 |                  | Controls (cross-harvest eGFR <sub>crea</sub> change <10 ml/min/1.73m <sup>2</sup> ) |                 |                 |
|-------------|-------|--------|-----|-------------------------------------------------|-----------------|------------------|-------------------------------------------------------------------------------------|-----------------|-----------------|
|             |       |        |     | N                                               | Baseline        | End-harvest      | N                                                                                   | Baseline        | End-harvest     |
|             |       |        |     |                                                 | Median (IQR)    | Median (IQR)     |                                                                                     | Median (IQR)    | Median (IQR)    |
| Unit        | LOQ   | % <LOQ |     |                                                 |                 |                  |                                                                                     |                 |                 |
| U-Clusterin | ng/ml | 0.91   | 65% | 22                                              | LOQ (LOQ-5.5)   | 2.3 (LOQ-7.0)    | 46                                                                                  | LOQ (LOQ-3.2)   | LOQ (LOQ-1.0)   |
| U-Calbindin | ng/ml | 1.6    | 45% | 22                                              | 19 (LOQ-61)     | 78 (LOQ-197)     | 46                                                                                  | 9 (LOQ-57)      | LOQ (LOQ-39)    |
| U-MCP-1     | ng/ml | 0.01   | 45% | 22                                              | 0.03 (LOQ-0.13) | 0.25 (0.03-1.35) | 46                                                                                  | 0.02 (LOQ-0.14) | LOQ (LOQ-0.13)  |
| U-KIM-1     | ng/ml | 0.01   | 35% | 22                                              | 0.07 (LOQ-0.35) | 0.24 (0.02-1.62) | 46                                                                                  | 0.04 (LOQ-0.25) | 0.02 (LOQ-0.20) |
| U-GST-π     | ng/ml | 0.06   | 38% | 22                                              | 0.28 (LOQ-1.18) | 0.90 (0.13-4.99) | 46                                                                                  | 0.39 (LOQ-1.49) | 0.18 (LOQ-0.68) |

MCP-1=Monocyte chemoattractant protein 1, KIM-1=Kidney injury molecule 1, GST-π =Glutathione S-transferase
